# Supplementary material for: Monovalent metal ion binding promotes the first transesterification reaction in the spliceosome
Source: PubMed Central journal article supplement (PMC10733407; doi:10.1038/s41467-023-44174-2), 2023-12-20
Supplement: 41467_2023_44174_MOESM3_ESM.pdf [file 41467_2023_44174_MOESM3_ESM.pdf]

## **Description of Additional Supplementary Files:**

**Supplementary Data 1:** XLS file containing a list of protonation states of ionisable residues. Chain identifiers and residue numbering are as in PDBID: 7B9V.

**Supplementary Movie 1:** The mechanism of the branching step of the splicing reaction as observed in hybrid quantum mechanical/classical molecular dynamics simulations.
